# Supplementary material for: Extreme Glacier Melt in the Central Tibetan Plateau during the Summer of 2022: Detection and Mechanisms
Source: Copernicus journal article supplement (doi:10.5194/egusphere-2025-2579), 2025-07-31
Supplement: Supplementary file [file egusphere-2025-2579-AC4-supplement.pdf]

**Comment 14:** L161: Photo should be singular Figure 1: Panel d is hard to make sense of. It would make sense to show a DEM hillshade or satellite image of the glacier, or at the very least use a different colorscale.

**Response:** Based on your comments, we have thoroughly updated Figure 1 again: in Figure 1a, we added the geographical location of the glacier focused on in this study; Figure 1b now uses a DEM hillshade; Figure 1c uses a Sentinel image as the base map with added contour lines to highlight the real topographic features of the Sangqu Glacier. In addition, we have added photographs of the automatic weather station and the precipitation gauge (Figures 1d and 1e). These changes have been incorporated into the updated Figure 1. Thank you for your careful review.

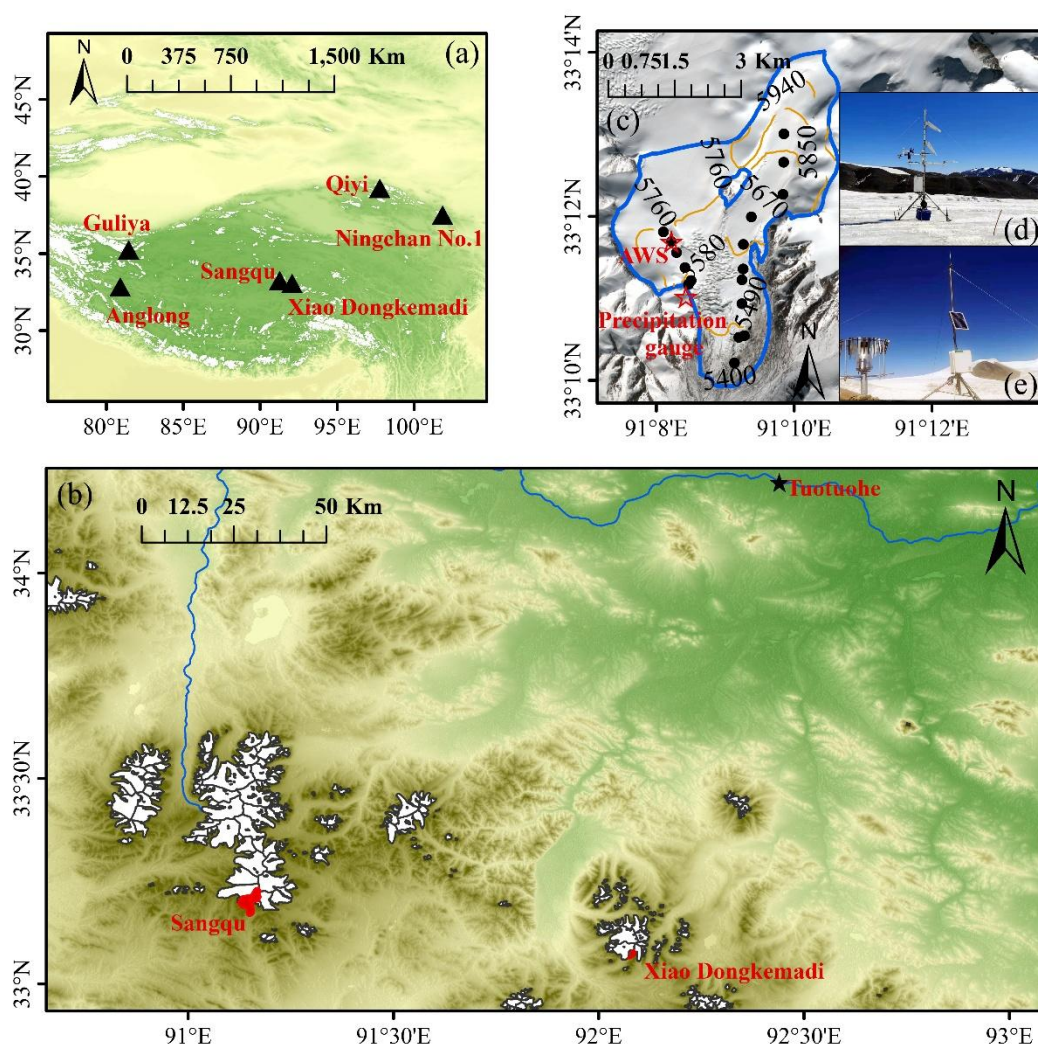

**Figure 1.** Overview of the study area. (a, b) Geographical location of the glacier on the Tibetan Plateau: (a) regional context; (b) enlarged local map. (c) Sentinel-2 image (2022-12-05) with contour lines showing the topography of Sangqu Glacier. (d, e) Photographs of the AWS and the precipitation gauge on Sangqu Glacier (Photo credit: Fei Zhu). The positions of the AWS, precipitation gauge, and stakes are indicated in panel (c).
